# Supplementary material for: Notch1 blockade by a novel, selective anti-Notch1 neutralizing antibody improves immunotherapy efficacy in melanoma by promoting an inflamed TME
Source: PubMed Central journal article supplement (PMC11533310; doi:10.1186/s13046-024-03214-5), 2024-11-04
Supplement: 13046_2024_3214_MOESM1_ESM.pdf [file 13046_2024_3214_MOESM1_ESM.pdf]

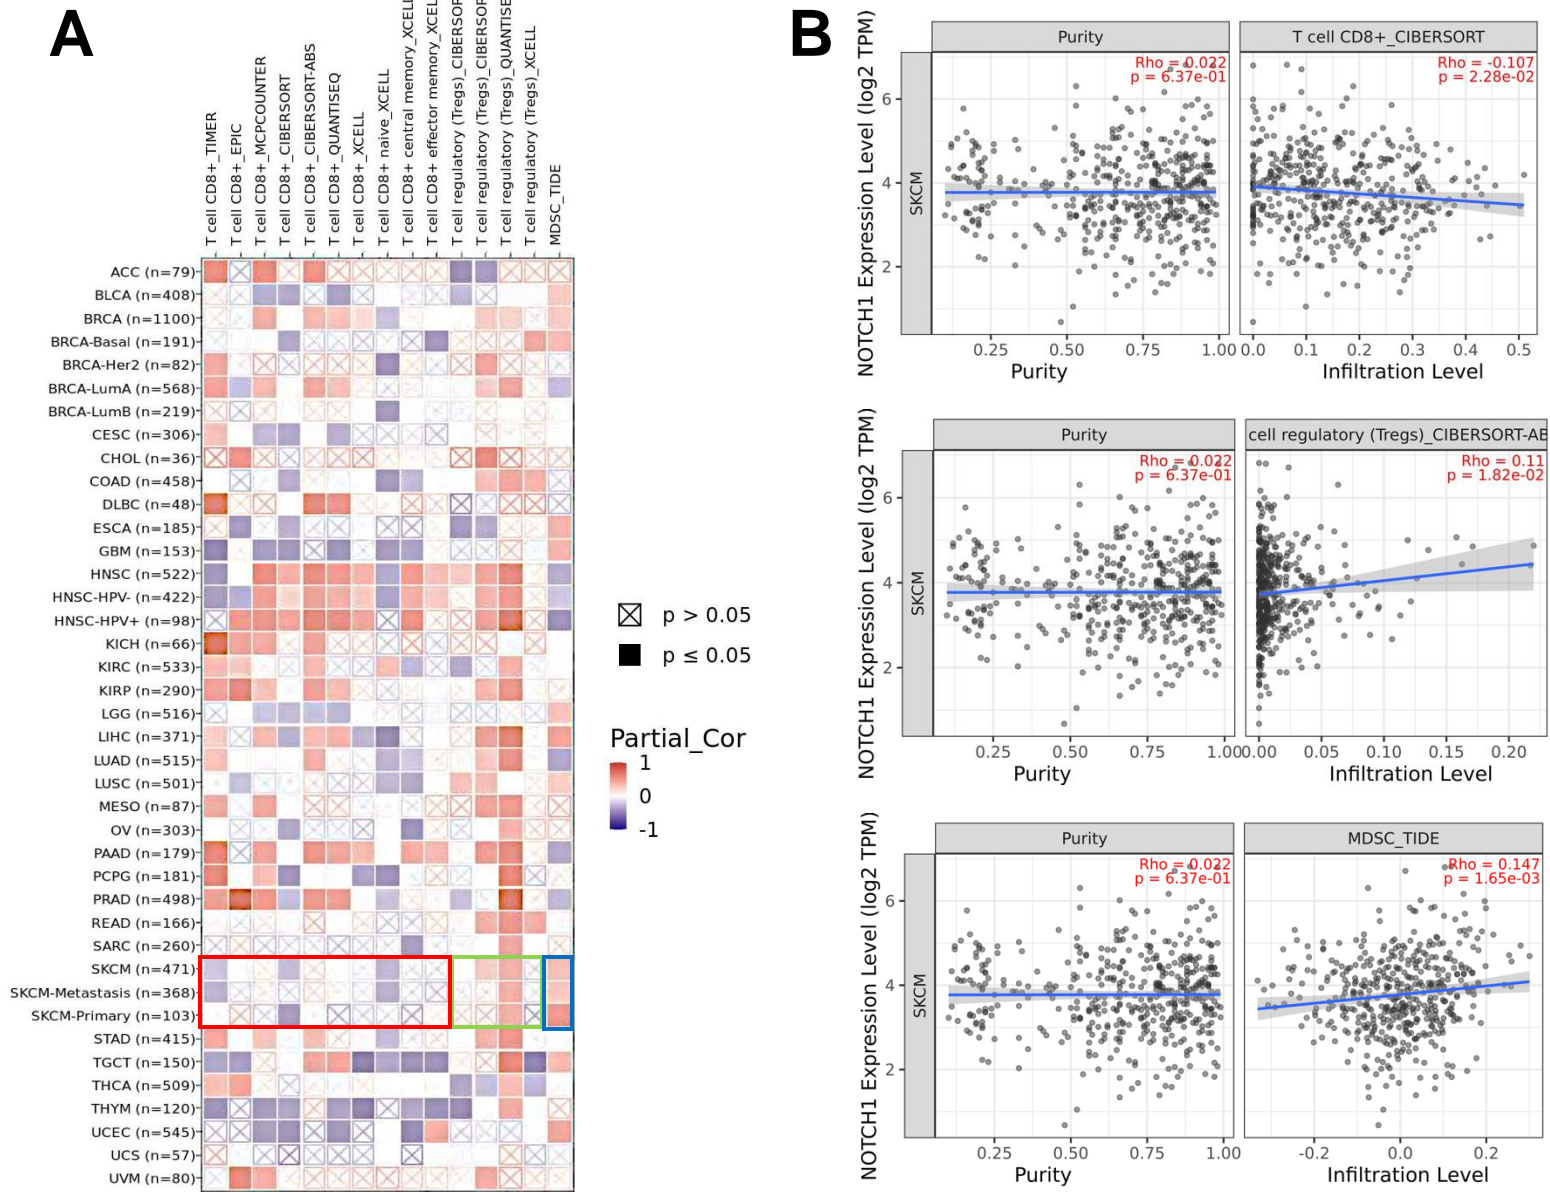

**Suppl. Fig. 1: Timer 2.0 immune infiltration in TCGA tumors correlated with Notch1. A)** complete heat map comprising all TCGA tumor types. Melanoma: SKCM. Red square: CD8+ T cells; Green square: Tregs; blue square: MDSCs. **B)** representative correlation between Notch1 and CD8+ T cells, Tregs or MDSCs infiltrate from the CIBERSORT and TIDE algorithms. Spearman's correlation,  $p < 0.05$ .

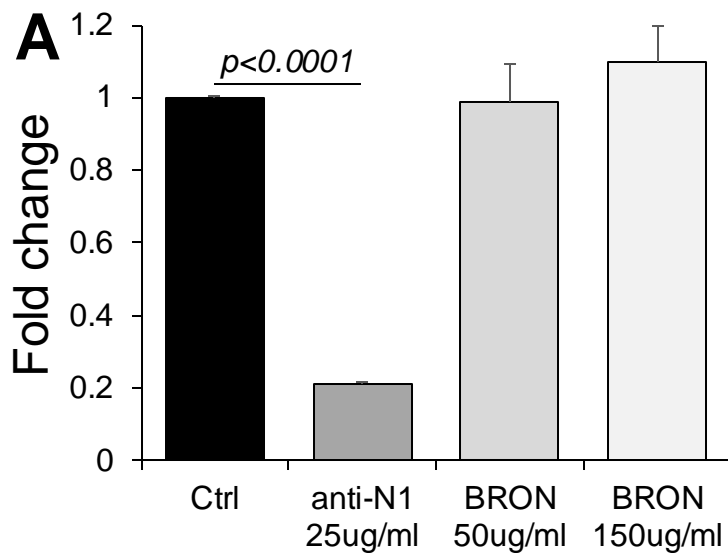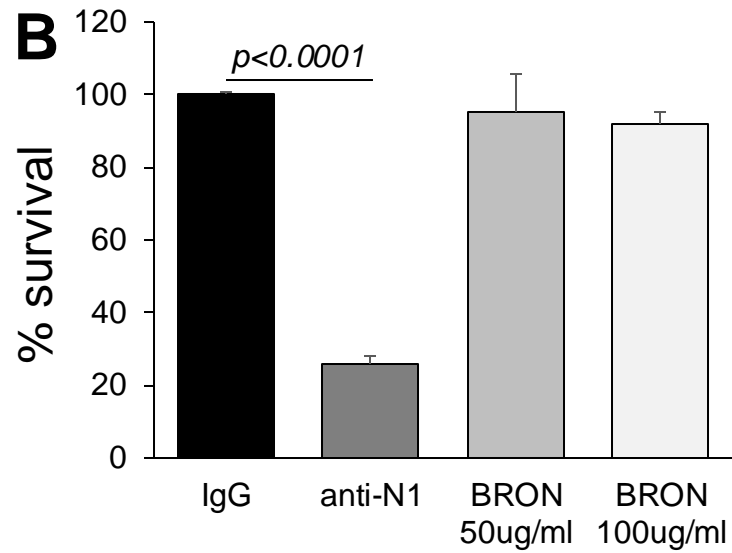

**Suppl. Fig. 2: Brontictuzumab does not affect Notch1 activity or cell survival. A)** qRT-PCR of SNAP23 in YUMM2.1 cells treated for three days with IgG control (100ug/ml) or anti-N1 (25ug/ml) or brontictuzumab (BRON – 50, 100 ug/ml). **B)** % survival of the cells in A, normalized to IgG control, set at 100%.  $p < 0.0001$ , Student's t test.

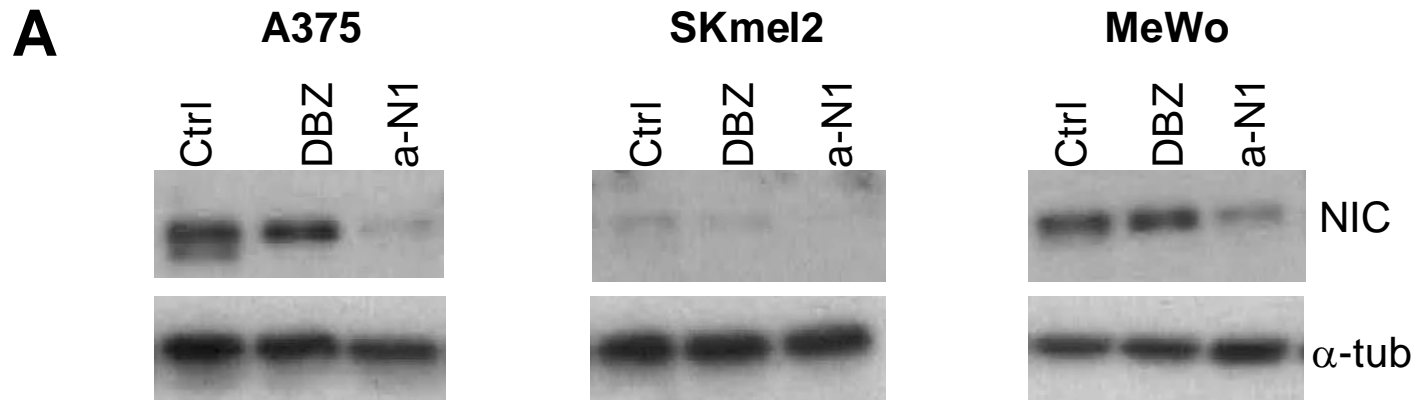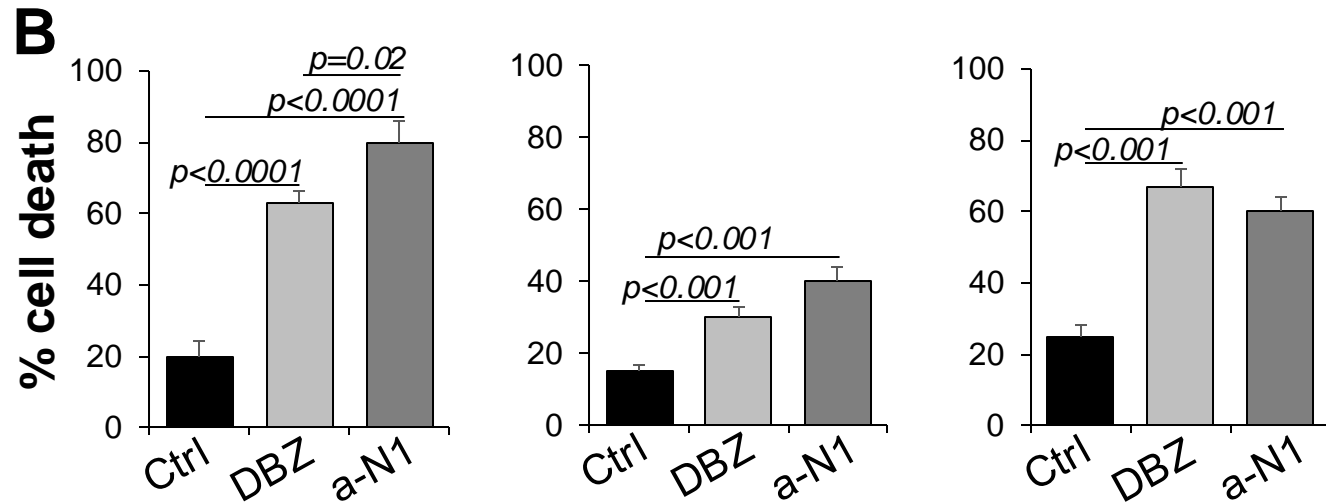

**Suppl. Fig. 3: anti-N1 reduces Notch1 activation and causes cell death in human melanoma cells: A)** Notch1-NIC expression in A375, SKmel2 and MeWo cells.  $\alpha$ -tubulin was used as loading control. **B)** % cell death of the cells in A (Trypan blue exclusion assay), after a three-day treatment with either IgG/DMSO, the GSI DBZ (10uM) or anti-N1 (25ug/ml). Values are the mean of two independent experiments each performed in triplicate. P values were determined by the Student's *t* test.

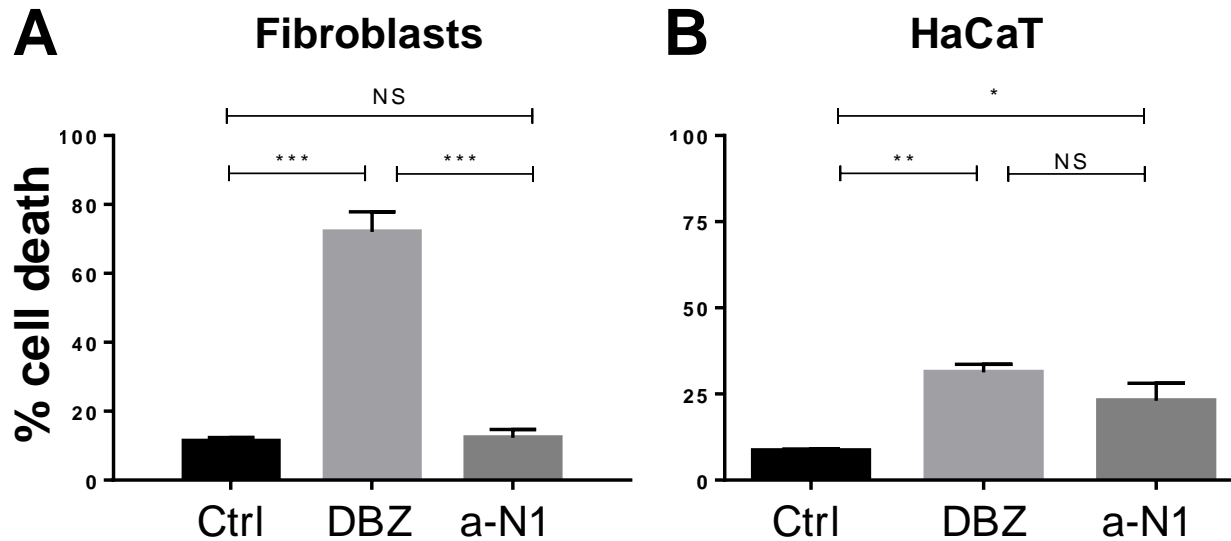

**Suppl. Fig. 4: anti-N1 does not affect normal human fibroblast and HaCaT cells; A-B) % dead cells (Trypan blue exclusion assay) for normal human fibroblasts and HaCaT cells after a three-day treatment with either the GSI DBZ (10uM) or anti-N1 (25ug/ml).  $p < 0.05$ , Student's t test.**

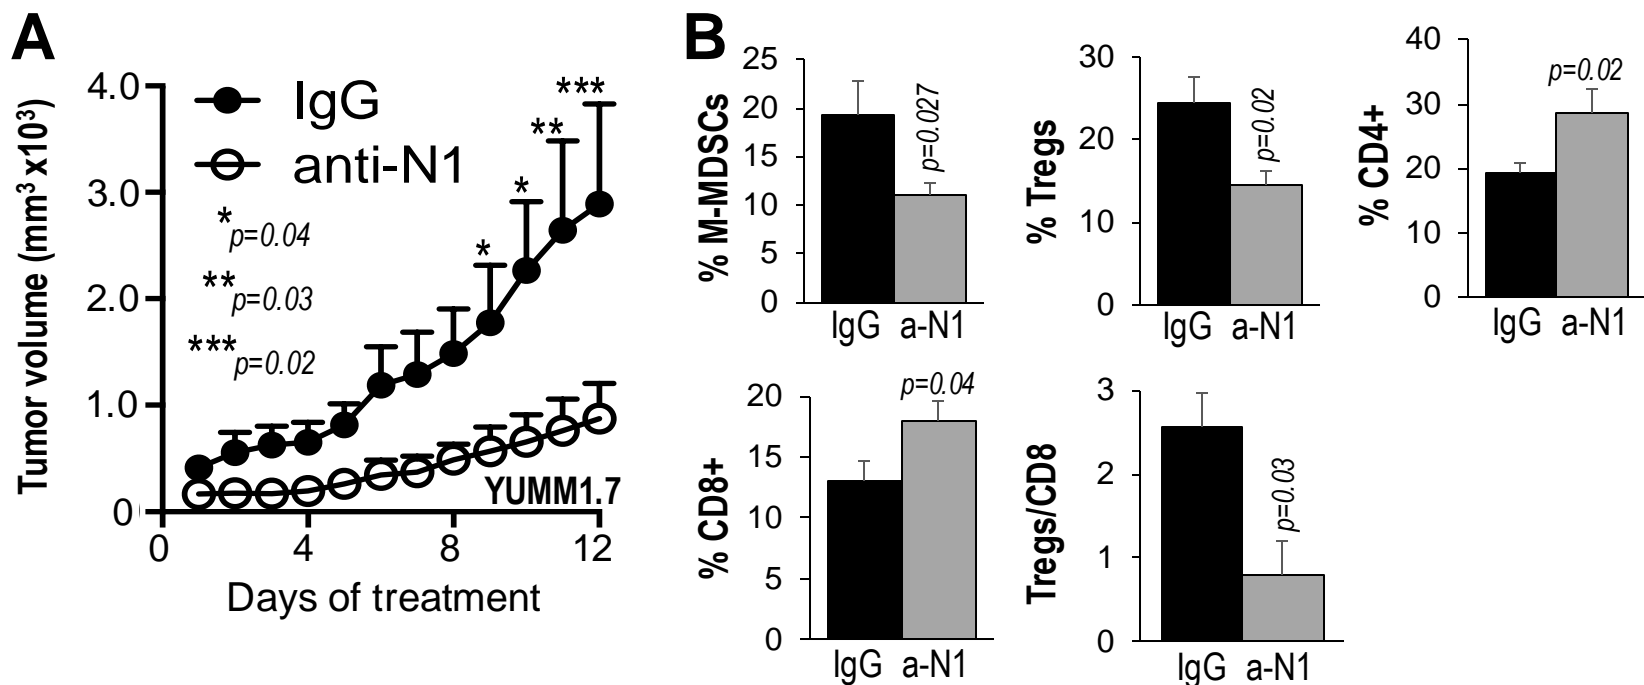

**Suppl. Fig. 5: A)** Growth rates of YUMM1.7 tumors treated with IgG or anti-N1 (10mg/Kg) every other day.  $n=10$  per group. **B)** % M-MDSCs ( $\text{CD}11\text{b}^+$ ;  $\text{Ly}6\text{C}^{\text{hi}}$ ;  $\text{Iy}6\text{G}^-$  = monocytic), Tregs ( $\text{CD}4^+/\text{FoxP}3^+$ ),  $\text{CD}4^+$  T cells,  $\text{CD}8^+$  T cells, in YUMM1.7 tumors from A. The Tregs/ $\text{CD}8$  ratio was calculated by dividing the absolute number of  $\text{CD}4^+/\text{FoxP}3^+$  and  $\text{CD}8^+$  T cells in tumors. Absolute numbers were obtained by normalizing the number of cells detected by Flow cytometry to the tumor mass. Data are the mean of two independent experiments. P values were calculated by the Student's t test.

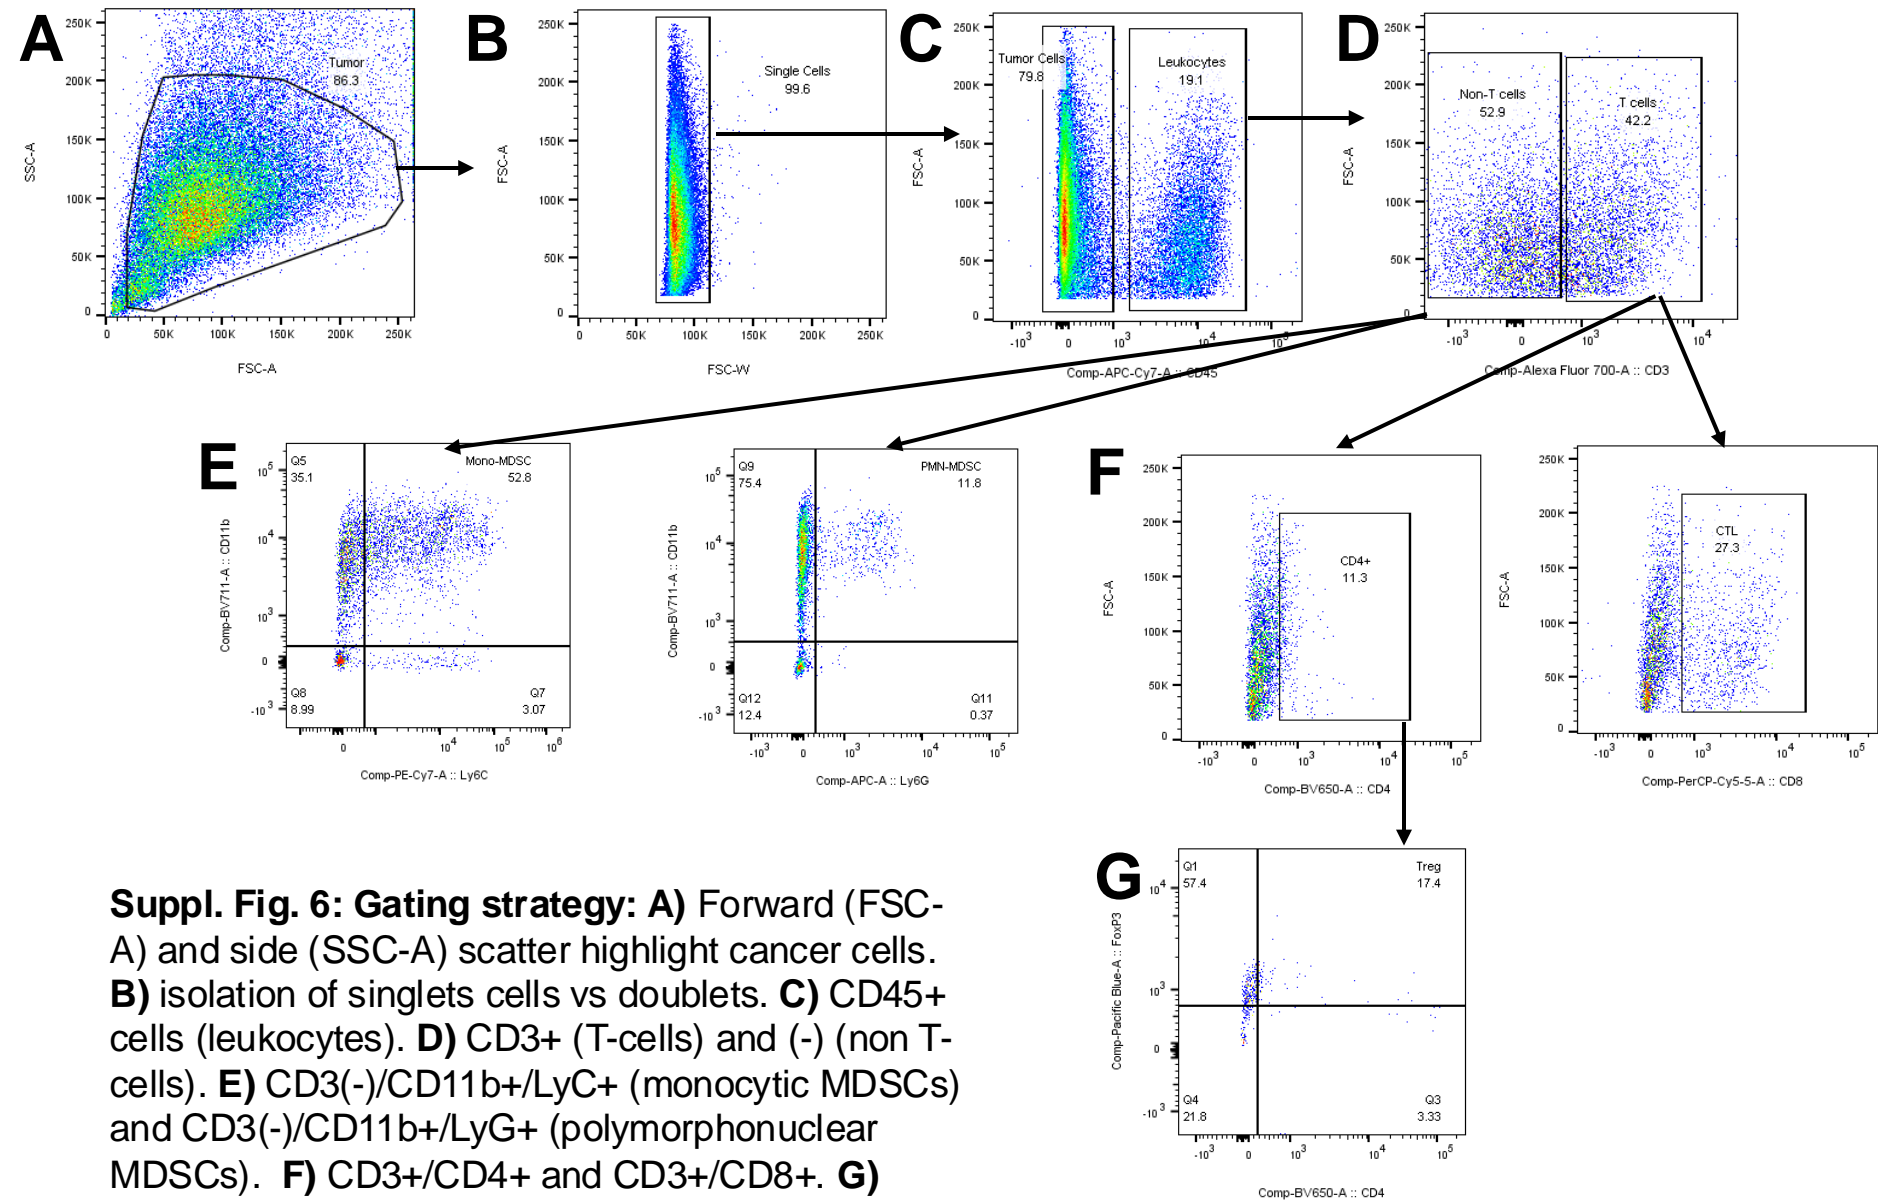

**Suppl. Fig. 6: Gating strategy:** **A)** Forward (FSC-A) and side (SSC-A) scatter highlight cancer cells. **B)** isolation of singlets cells vs doublets. **C)** CD45+ cells (leukocytes). **D)** CD3+ (T-cells) and (-) (non T-cells). **E)** CD3(-)/CD11b+/LyC+ (monocytic MDSCs) and CD3(-)/CD11b+/LyG+ (polymorphonuclear MDSCs). **F)** CD3+/CD4+ and CD3+/CD8+. **G)** CD3+/CD4+/FoxP3+ (Tregs).

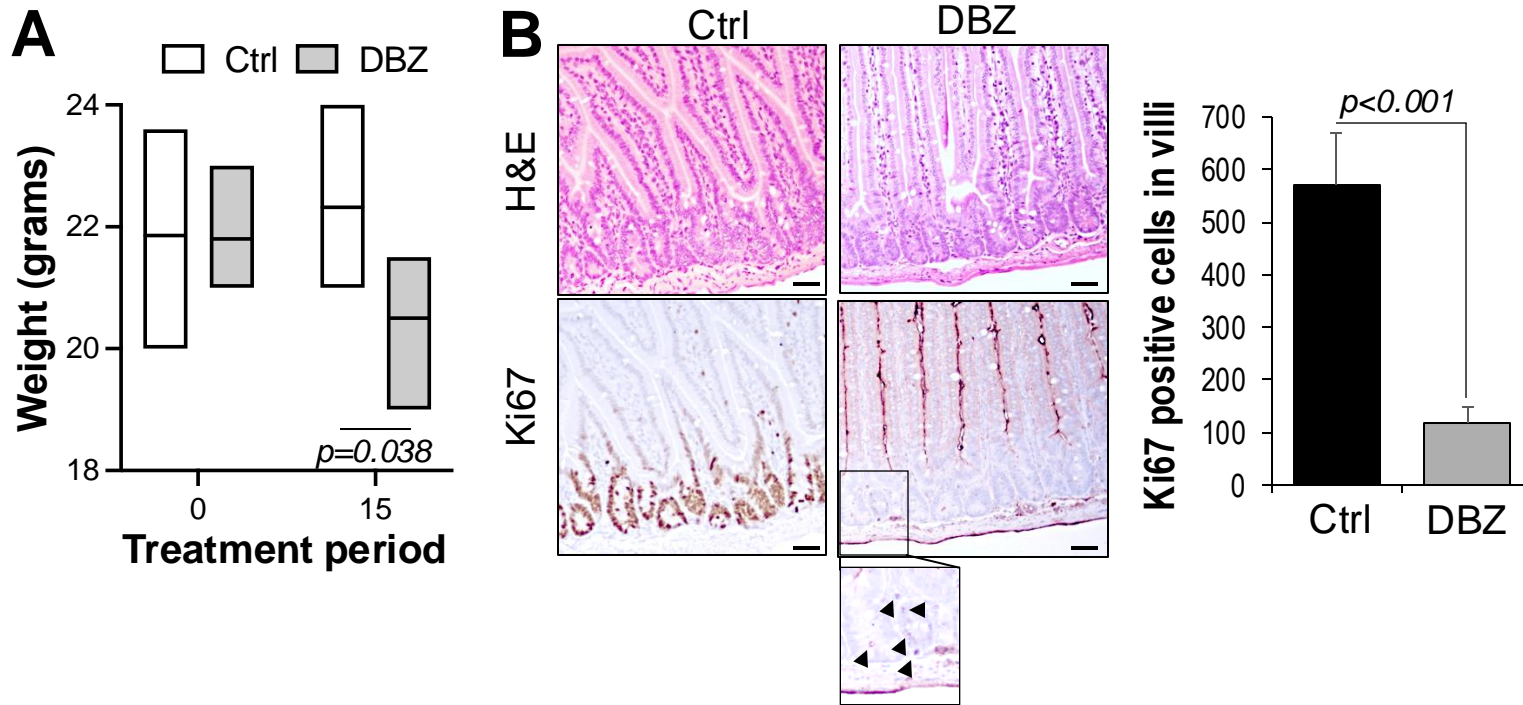

**Suppl. Fig. 7: A)** C57B/6 mice were treated for two weeks with DBZ (10 $\mu$ mol/Kg) or DMSO (Ctrl), every other day. Animal weigh was measured at time 0 prior to treatment initiation, and at the end time point. A significant reduction in weight was observed in the DBZ treated animals at the end time point. **B)** H&E and Ki67 staining of sections of intestines from the mice in A, collected at the end time point. Left: representative pictures; right: quantification of Ki positive cells. Five section per mouse were quantified for each treatment group. Inset: few Ki67 positive cells are observed in the crypts of DBZ treated mice, with a lighter staining intensity. A and B: n=5 per group.

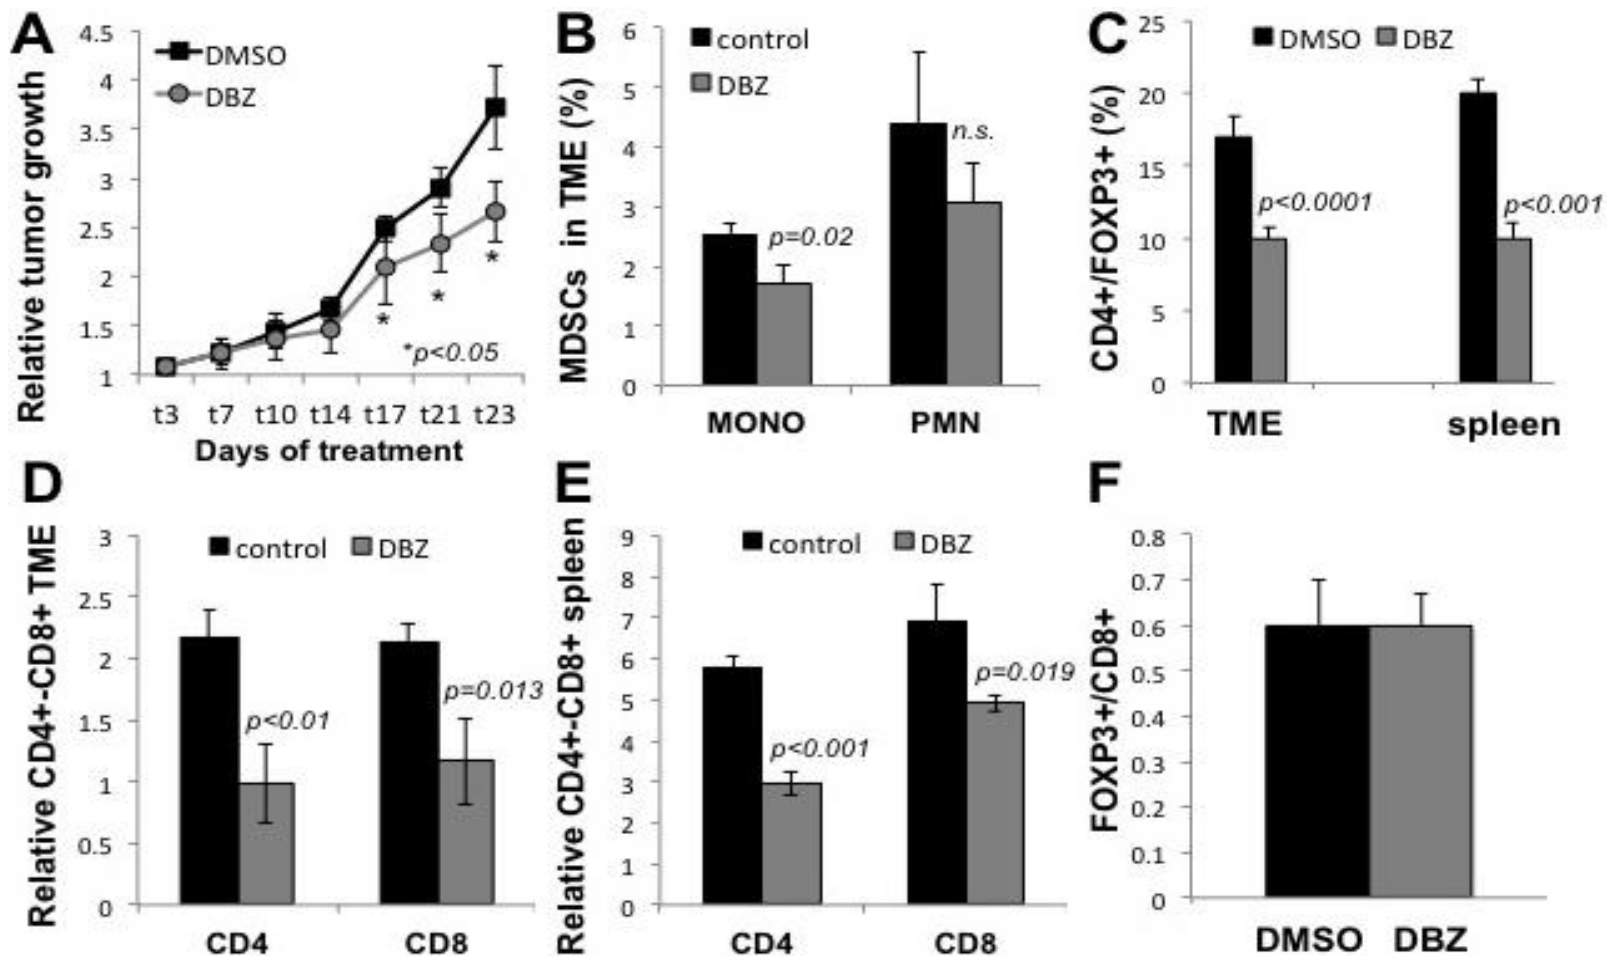

**Suppl. Fig. 8: GSI mediated Notch inhibition causes immunosuppression: A)** Growth of mouse melanomas induced by a single topical application of 5uM 4-Hydroxitamoxifen on the back of Tyr::CreER; Bra<sup>f</sup><sup>CA/+</sup>; Pten<sup>lox/lox</sup> (BRAF/P TEN) transgenic mice. DBZ (10umol/Kg) (dibenzazepine – GSI). Regimen: 3 days on, 4 days holiday. n=10 per group. **B)** % mono- and poly-morphonuclear MDSCs in the tumors in A. **C)** % of Tregs (CD4+/FoxP3+) in the TME and spleen. **D-E)** Relative number of CD4(+) and CD8(+) T cells in the TME and spleen. **F)** Tregs/CD8 ratio in the TME. Data are the mean of two independent experiments.



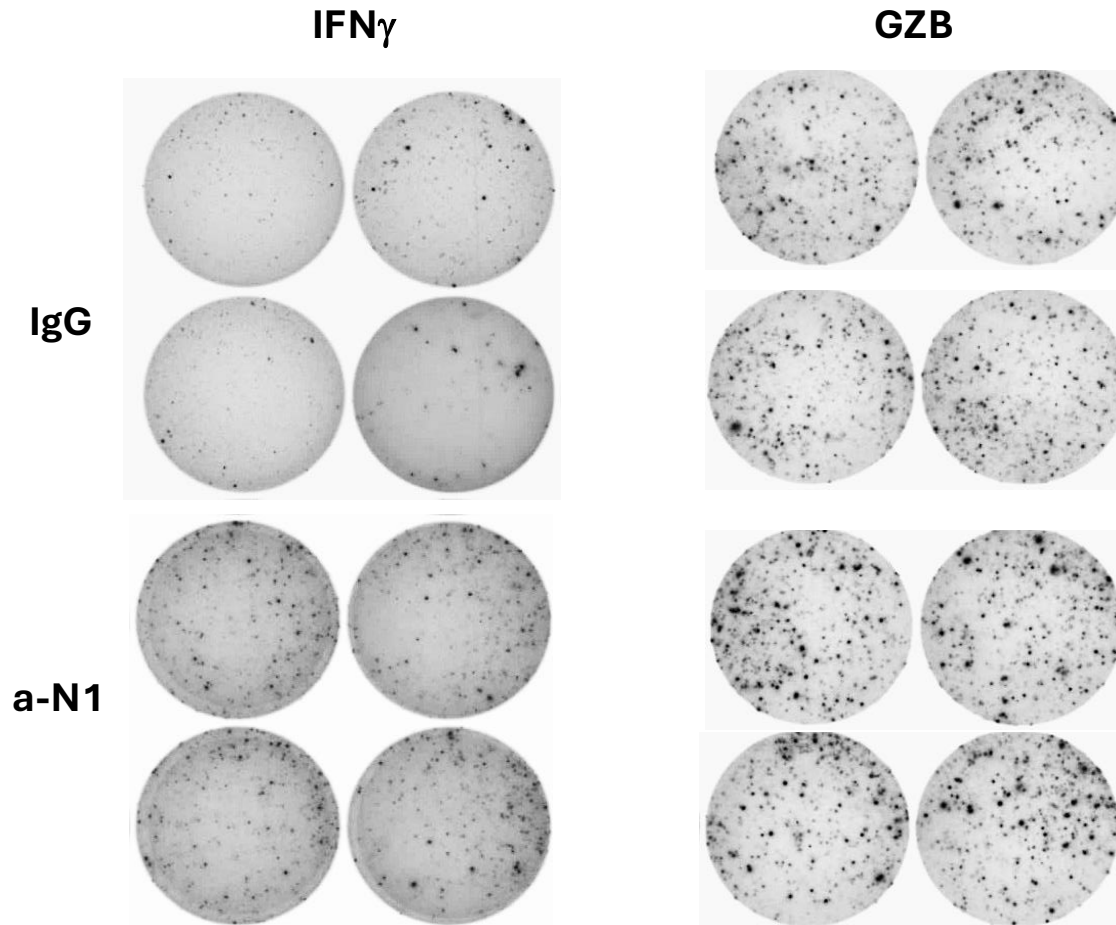

**Suppl. Fig. 9) anti-N1 favors IFN $\gamma$  and granzymeB expression in TILs isolated from treated tumors.** Tumors were treated with IgG or anti-N1 (10mg/Kg) every other day for 14 days, TILs were extracted and seeded in vitro, then treated with anti-N1 O/N.

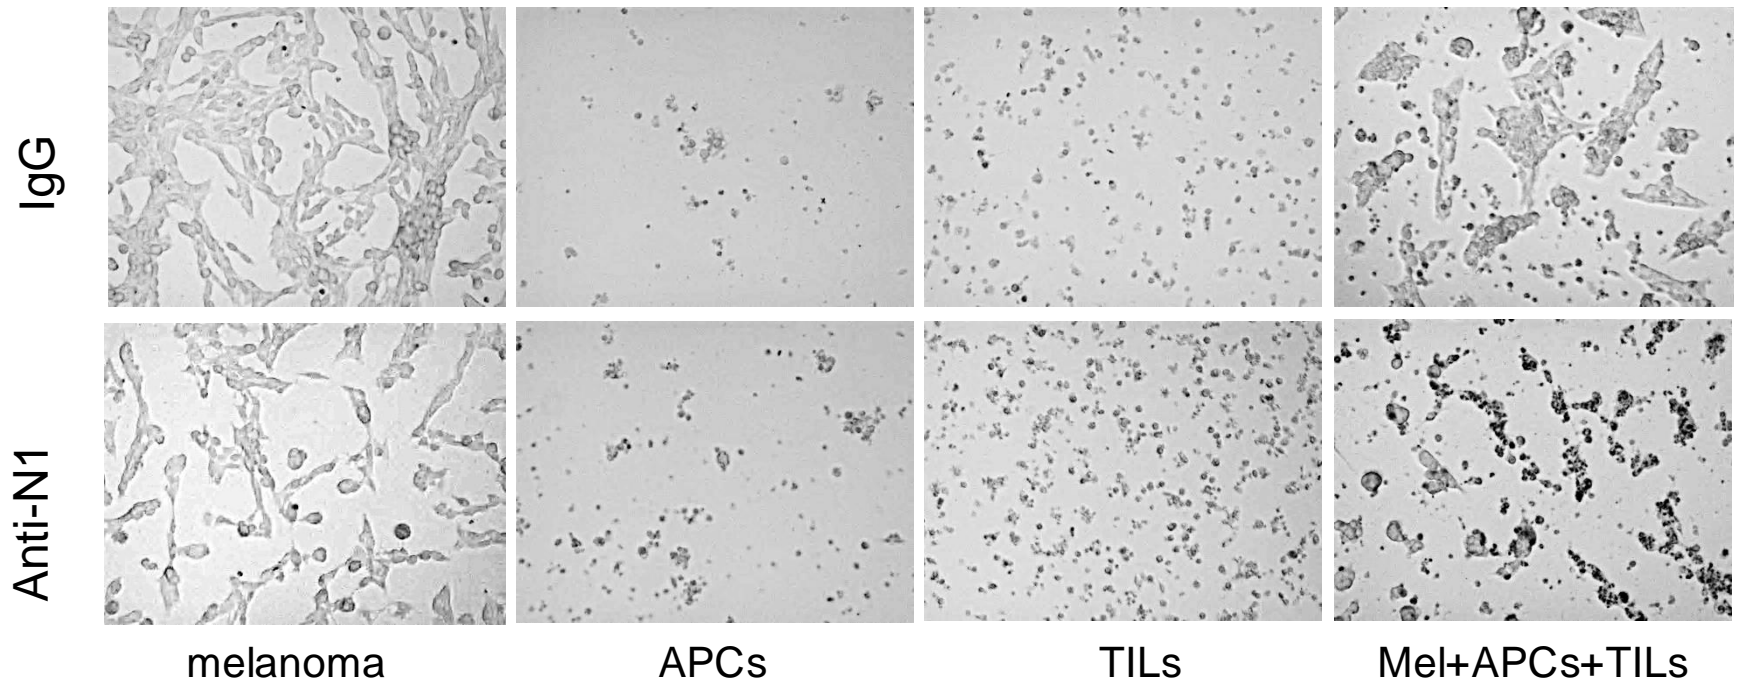

**Suppl. Fig. 10)** representative brightfield pictures of YUMM2.1 melanoma cells , APCs, TILs and YUMM2.1 melanoma cells in the presence of both APCs and TILs extracted from tumors treated with IgG or a-N1.

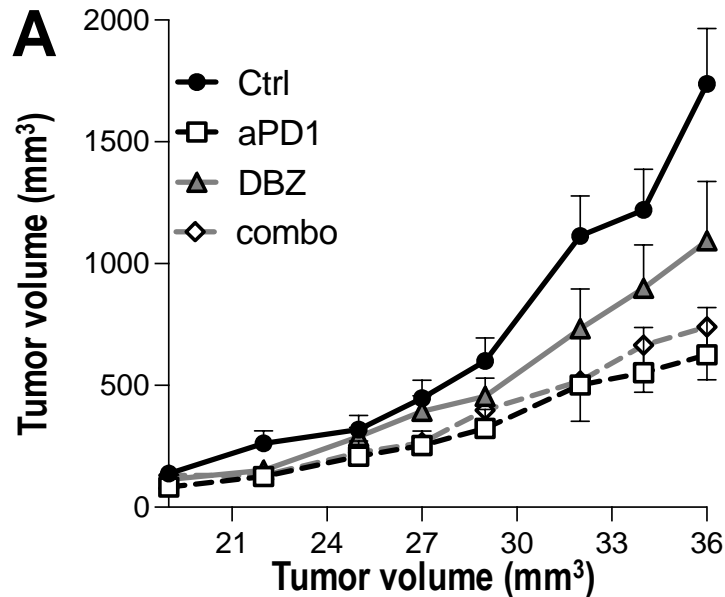

**B**

| <i>T test</i> | ctrl vs aPD1 | ctrl vs DBZ | ctrl vs combo | aPD1 vs combo | DBZ vs combo |
|---------------|--------------|-------------|---------------|---------------|--------------|
| 19            | n.s.         | n.s.        | n.s.          | n.s.          | n.s.         |
| 22            | 0.018        | n.s.        | 0.017         | n.s.          | n.s.         |
| 25            | n.s.         | n.s.        | 0.042         | n.s.          | n.s.         |
| 27            | 0.033        | n.s.        | 0.030         | n.s.          | n.s.         |
| 29            | 0.021        | n.s.        | 0.048         | n.s.          | n.s.         |
| 32            | 0.020        | 0.03        | 0.014         | n.s.          | n.s.         |
| 34            | 0.011        | 0.05        | 0.028         | n.s.          | n.s.         |
| 36            | 0.0016       | 0.05        | 0.004         | n.s.          | n.s.         |

**Suppl. Fig. 11) DBZ does not improve anti-PD1 efficacy. A)** tumor growth of YUMM2.1 cells inoculated s.c. into C57 B/L6 mice. Treatment with DMSO/IgG control (10mg/Kg), DBZ (10umol/Kg) or anti PD1 (100ug/mouse) started at day 19 post inoculation, when tumors reached an average volume of 150mm<sup>3</sup>. **B)** Student's t test for each time point. n.s.= not significant. n=10 tumors per group.
